# Supplementary material for: Impacts of the Biocontrol Strain Pseudomonas simiae PICF7 on the Banana Holobiont: Alteration of Root Microbial Co-occurrence Networks and Effect on Host Defense Responses
Source: Front Microbiol. 2022 Feb 15;13:809126. doi: 10.3389/fmicb.2022.809126 (PMC8885582; doi:10.3389/fmicb.2022.809126)
Supplement: Supplementary file 3 [file Table_5.xlsx]

## Sheet: Target & reference genes
	Supporting Information Table S5. RT-qPCR primers for the thirteen selected genes and the two reference genes used in this study.
	aFull reference list indicated below the table
	bGene IDs corresponding to the Musa acuminata reference genome version 2 (Martin et al., 2016)
	F: forward primer; R: reverse primer; N.A.: not available
	Category	Gene name	Abbreviation	Analyzed tissue	aReferences	Arabidopsis thaliana ortholog(s)	bMusa acuminata paralog(s)	Primer sequence	Amplicon size (bp)	F/R concentration (nM)	Temp. Annealing (°C)	cDNA dilution	Cycles	Amplification Efficiency (E)	Correlation Coefficient (R2)	Linear equation
	Plant defense	ALLENE OXIDE SYNTHASE 1	AOS	Roots	Creelman and Mullet, 1997	AT5G42650	Ma08_g02680	F: ATGCTGTTCGGGTACCAGCC	175	150/150	60	20x	40	ROOT: 0.920	ROOT: 0.995	ROOT: y= -3.529x + 30.773
						AT4G15440	Ma04_g38880	R: CGGCGCACTGCTTGTTCTCC						LEAF: N.A.	LEAF: N.A.	LEAF: N.A.
							Ma02_g15160
		ANTHRANILATE SYNTHASE ALPHA SUBUNIT 1	ASA1	Roots & Leaves	Niyogi and Fink, 1992	AT5G05730	Ma09_g07380	F: GATGAGCAGCGAGAATGTGA	116	150/150	60	20x	40	ROOT: 0.966	ROOT: 0.988	ROOT: y= -3.406x + 27.188
						AT2G29690		R: TCCGAGTGATGAGCCTTTCT						LEAF: 0.950	LEAF: 0.995	LEAF: y= -3.447x + 30.568
						AT3G55870
		CORONATINE INSENSITIVE 1	COI1	Roots & Leaves	Xie et al., 1998	AT2G39940	Ma09_g03700	F: ATCGACGCCCTCTCGCGGAA	113	150/150	60	20x	40	ROOT: 1.057	ROOT: 0.998	ROOT: y= -3.192x + 26.669
							Ma06_g35580	R: GGCTTGCCCTTGAGCTTGAG						LEAF: 1.049	LEAF: 0.998	LEAF: y= -3.209x + 28.888
							Ma05_g31310
		ENHANCED DISEASE SUSCEPTIBILITY 1	EDS1	Roots & Leaves	Cui et al., 2017	AT3G48090	Ma08_g26030	F: CTGCATTGCTAGGTTCGTGA	116	150/150	60	20x	40	ROOT: 0.983	ROOT: 0.996	ROOT: y= -3.363x + 29.715
						AT3G48080		R: TTCGTGCTGATTCAGGTTTG						LEAF: 1.018	LEAF: 0.997	LEAF: y= -3.279x + 32.142
		ISOCHORISMATE SYNTHASE 1	ICS1	Roots & Leaves	Shah, 2003	AT1G74710	Ma03_g33700	F: GTGGGAAGAGCTGGAGTTGA	139	150/150	60	20x	40	ROOT: 1.012	ROOT: 0.978	ROOT: y= -3.293x + 28.806
						AT1G18870		R: TTGAGGCCCTGGATGTATCT						LEAF: 0.915	LEAF: 0.994	LEAF: y= -3.545x + 29.622
		JASMONIC ACID CARBOXYL METHYLTRANSFERASE	JMT	Roots	Seo et al.,2001	AT1G19640	Ma11_g12140	F: TCGTTGCCCGAGTTCTACC	143	150/150	60	20x	40	ROOT: 1.003	ROOT: 0.997	ROOT: y= -3.315x + 28.969
							Ma03_g01030	R: CAGTGAAGGCTCGACGAGGA						LEAF: N.A.	LEAF: N.A.	LEAF: N.A.
		NONEXPRESSER OF PR GENES 1	NPR1	Roots & Leaves	Zhou et al.,2000	AT1G64280	Ma08_g05340	F: GCAAAGGCTCTACATTATGC	137	150/150	60	20x	40	ROOT: 0.981	ROOT: 0.999	ROOT: y= -3.369x + 27.911
						AT4G26120	Ma03_g16200	R: TCTTTACGCATTGCAGCAA						LEAF: 1.016	LEAF: 0.988	LEAF: y= -3.284x + 30.546
						AT4G19660	Ma03_g27100
						AT5G45110
		PHYTOALEXIN DEFICIENT 4	PAD4	Roots & Leaves	Cui et al., 2017	AT3G52430	Ma02_g22600	F: CCCACGACTTCCACAAGCG	157	150/150	60	20x	40	ROOT: 0.974	ROOT: 0.995	ROOT: y= -3.386x + 29.437
							Ma06_g14360	R: AACACCTCGTACCTCCTCTC						LEAF: 1.006	LEAF: 0.989	LEAF: y= -3.308x + 33.079
		PHENYLALANINE AMMONIA-LYASE	PAL	Roots & Leaves	Shah, 2003	AT2G37040	Ma11_g14940	F: AACCCGAGCTTGGACTACGG	134	150/150	60	20x	40	ROOT: 0.970	ROOT: 0.999	ROOT: y= -3.396x + 25.441
						AT3G53260	Ma11_g21180	R: GGAGTTGACGTCTTGGTTGTGC						LEAF: 1.028	LEAF: 0.996	LEAF: y= -3.256x + 29.097
						AT5G04230	Ma01_g04420
						AT3G10340	Ma02_g00760
							Ma05_g03720
							Ma05_g20900
							Ma08_g14940
							Ma09_g15390
		POLYPHENOL OXIDASE	PPO	Roots & Leaves	Constabel & Barbehenn, 2008	N.A.	Ma10_g20510	F: CAGCAGGCCAACATCCACTGC	109	150/150	60	20x	40	ROOT: 0.916	ROOT: 0.995	ROOT: y=-3.541x + 25.603
							Ma06_g31080	R: CGG TGC CAG GGG AGG AAG A						LEAF: 1.048	LEAF: 0.991	LEAF: y= -3.212x + 31.987
							Ma07_g03540
							Ma07_g03650
							Ma08_g34740
							Ma08_g09160
							Ma08_g09150
							Ma08_g09170
							Ma08_g09180
		PATHOGENESIS-RELATED 1	PR1	Roots	Stintzi et al., 1993	AT2G14610	Ma03_g08160	F: CGACGACCCATTTCAAGTTC	135	150/150	60	20x	40	ROOT: 0.960	ROOT: 0.990	ROOT: y= -3.422x + 23.614
							Ma03_g08150	R: ATTCCCGTCACAGTCTCCTT						LEAF: N.A.	LEAF: N.A.	LEAF: N.A.
							Ma03_g08140
							Ma09_g15840
	ROS detoxification	ASCORBATE PEROXIDASE 1	APX1	Roots & Leaves	Davletova et al., 2005	AT1G07890	Ma05_g07040	F: AGCCCATCAAGGAGCAGTTC	132	150/150	60	20x	40	ROOT: 0.918	ROOT: 0.999	ROOT: y= -3.534x + 24.722
						AT4G35000	Ma06_g34810	R: GGAGGTTCAGGCTTGTCCTC						LEAF: 0.982	LEAF: 0.998	LEAF: y= -3.366x + 27.256
						AT4G35970	Ma07_g15360
						AT3G09640
		MANGANESE SUPEROXIDE DISMUTASE 1	MSD1	Roots & Leaves	Jones et al., 2006	AT3G10920	Ma08_g22100	F: TTGGAGGCTCTGGTGCAGAA	125	150/150	60	20x	40	ROOT: 0.947	ROOT: 0.997	ROOT: y= -3.456x + 24.697
						AT3G56350	Ma02_g20650	R: TGGATCCTGATTTGCAGTGG						LEAF: 1.036	LEAF: 0.992	LEAF: y= -3.239x + 28.216
							Ma03_g09610
							Ma03_g19080
	Reference genes	ELONGATION FACTOR 1α	EF1a	Roots & Leaves	Zorrilla-Fontanesi et al., 2016									ROOT: 0.978	ROOT: 0.999	ROOT: y= -3.377x + 22.983
														LEAF: 1.002	LEAF: 0.999	LEAF: y= -3.317x + 26.387
		RIBOSOMAL PROTEIN L2	L2	Roots & Leaves	Zorrilla-Fontanesi et al., 2016									ROOT: 0.940	ROOT: 0.998	ROOT: y= -3.475x + 25.521
														LEAF: 0.949	LEAF: 0.994	LEAF: y= -3.450x + 28.791
		References
	1	Constabel, C. P., and Barbehenn, R. (2008). Defensive roles of polyphenol oxidase in plants, in Induced Plant Resistance to Herbivory, ed. A. Schaller (Dordrecht: Springer Science and Business Media B.V.), 253–269.
	2	Creelman, R.A. and Mullet, J.E. (1997). Biosynthesis and Action of Jasmonates in Plants. Annu. Rev. Plant Physiol. Plant Mol. Biol. 48, 355-381.
	3	Cui, H., Gobbato, E., Kracher, B., et al. (2017). A core function of EDS1 with PAD4 is to protect the salicylic acid defense sector in Arabidopsis immunity. New Phytol. 213(4):1802-1817.
	4	Davletova, S., Rizhsky, L., Liang, H., et al. (2005). Cytosolic ascorbate peroxidase 1 is a central component of the reactive oxygen gene network of Arabidopsis. Plant Cell. 17(1):268-281.
	5	Jones, A.M.B., Thomas, V., Bennett, M.H., Mansfield, J., Grant, M. (2006). Modifications to the Arabidopsis defense proteome occur prior to significant transcriptional change in response to inoculation with Pseudomonas syringae. Plant Physiol. 142(4), 1603–1620.
	6	Niyogi, KK., Fink, GR. (1992). Two anthranilate synthase genes in Arabidopsis: defense-related regulation of the tryptophan pathway. The Plant Cell. 4 (6): 721–733
	8	Seo, H.S., Song, J.T., Cheong, J-J., et al. (2001). Jasmonic acid carboxyl methyltransferase: a key enzyme for jasmonate-regulated plant responses. PNAS 98 (8): 4788-93
	9	Shah, J. (2003). The salicylic acid loop in plant defense. Curr. Opin. Plant Biol. 6: 365–371.
	10	Stintzi, A., Heitz, T., Prasad V., et al. (1993). Plant ‘pathogenesis-related’ proteins and their role in defense against pathogens. Biochimie 75:687–706
	11	Xie, D.X., Feys, B.F., James, S., Nieto-Rostro, M., Turner J.G. (1998). COI1: an Arabidopsis gene required for jasmonate-regulated defense and fertility. Science. 280(5366):1091-4.
	12	Zhou, J.M., Trifa, Y., Silva, H., Pontier, D., Lam, E., Shah, J., Klessig, D.F. (2000). NPR1 differentially interacts with members of the TGA/OBF family of transcription factors that bind an element of the PR-1 gene required for induction by salicylic acid. Mol. Plant Microbe Interact. 13: 191–202.
	13	Zorrilla-Fontanesi, Y., Rouard, M., Cenci, A. et al. (2016). Differential root transcriptomics in a polyploid non-model crop: the importance of respiration during osmotic stress. Sci. Rep. 6: 22583.
